# Supplementary material
Source: PubMed Central journal article supplement (PMC11338316)
Supplement: NIHMS2014308-supplement-1.pdf [file NIHMS2014308-supplement-1.pdf]

## Supplementary Material

**Article Title:** Prescription Opioid Use Disorder Among Adults Reporting Prescription Opioid Use With or Without Misuse in the United States

**Authors:** Beth Han, MD, PhD, MPH; Christopher M. Jones, PharmD, DrPH, MPH; Emily B. Einstein, PhD; Deborah Dowell, MD, MPH; and Wilson M. Compton, MD, MPE

**DOI Number:** 10.4088/JCP.24m15258

### **LIST OF SUPPLEMENTARY MATERIAL FOR THE ARTICLE**

1. [Table 1](#) Past-Year Prevalence of Prescription Opioid Use Disorder (Rx OUD), Individual Symptoms, and the Number of Symptoms by Prescription Opioid Misuse Status in US Adults With Past-Year Use of Prescription Opioids
2. [Table 2](#) Prevalence of Receiving Any Substance Use Treatment for Prescription Opioid Use Problems by the Number of Prescription Opioid Use Disorder Symptoms and Misuse Status in US Adults With Past-Year Prescription Opioid Use

### **DISCLAIMER**

This Supplementary Material has been provided by the author(s) as an enhancement to the published article. It has been approved by peer review; however, it has undergone neither editing nor formatting by in-house editorial staff. The material is presented in the manner supplied by the author.

Supplementary Table 1. Past-year prevalence of prescription opioid use disorder (Rx OUD), individual symptoms, and the number of symptoms by prescription opioid misuse status in US adults with past-year use of prescription opioids

| Prescription opioid use disorder based on DSM-5 criteria (N=11,090)                              | Adults reporting Rx opioid misuse n=1,556 wtd % (95% CI) | Adults reporting Rx opioid use without misuse n=9,534 wtd % (95% CI) |                                  | Prevalence ratio (95% CI)                                  |                                                            |
|--------------------------------------------------------------------------------------------------|----------------------------------------------------------|----------------------------------------------------------------------|----------------------------------|------------------------------------------------------------|------------------------------------------------------------|
|                                                                                                  |                                                          | Excluding tolerance & withdrawal                                     | Including tolerance & withdrawal | Excluding tolerance & withdrawal for adults without misuse | Including tolerance & withdrawal for adults without misuse |
| <b>Meeting <math>\geq 2</math> Rx OUD criteria</b>                                               | 22.0 (18.6-25.8)                                         | 4.9 (4.2-5.7)                                                        | 7.0 (6.2-8.0)                    | 4.5 (3.6-5.6)                                              | 3.1 (2.4-3.7)                                              |
| <b>Meeting a specific Rx OUD criterion</b>                                                       |                                                          |                                                                      |                                  |                                                            |                                                            |
| 1. often taken in larger amounts, longer than intended                                           | 11.9 (9.1-15.4)                                          | 1.7 (1.3-2.2)                                                        |                                  | 7.1 (5.0-10.2)                                             |                                                            |
| 2. unsuccessful efforts to cut down/control use                                                  | 12.3 (9.6-15.5)                                          | 6.4 (5.5-7.4)                                                        |                                  | 1.9 (1.5-2.6)                                              |                                                            |
| 3. spending a great deal of time obtaining, using, recovering                                    | 12.4 (10.1-15.1)                                         | 5.9 (5.0-7.0)                                                        |                                  | 2.1 (1.6-2.7)                                              |                                                            |
| 4. craving/strong urge to use                                                                    | 19.8 (16.2-23.9)                                         | 6.2 (5.5-6.9)                                                        |                                  | 3.2 (2.6-4.0)                                              |                                                            |
| 5. recurrent use resulting in failure to fulfill major role obligations at work/school/home      | 7.0 (4.7-10.4)                                           | 0.7 (0.5-1.0)                                                        |                                  | 10.1 (6.2-16.4)                                            |                                                            |
| 6. continued use despite social problems                                                         | 6.0 (4.1-8.8)                                            | 0.5 (0.3-0.9)                                                        |                                  | 11.1 (6.1-20.1)                                            |                                                            |
| 7. important social, occupational, or recreational activities given up or reduced because of use | 8.6 (6.1-11.9)                                           | 1.6 (1.1-2.2)                                                        |                                  | 5.5 (3.3-9.1)                                              |                                                            |
| 8. recurrent use in physically hazardous situations                                              | 4.6 (2.9-7.4)                                            | 0.4 (0.3-0.7)                                                        |                                  | 11.2 (6.0-21.0)                                            |                                                            |
| 9. continued use despite physical, psychological problems                                        | 6.9 (4.9-9.6)                                            | 0.8 (0.6-1.1)                                                        |                                  | 8.6 (2.1-5.2)                                              |                                                            |
| 10. increased amount of substance needed to achieve same effect                                  | 19.0 (15.6-23.0)                                         |                                                                      | 5.3 (4.5-6.3)                    |                                                            | 3.6 (2.7-4.7)                                              |
| 11. withdrawal symptoms or the same or related substance is taken to avoid withdrawal symptoms   | 19.2 (15.8-23.2)                                         |                                                                      | 4.7 (4.0-5.6)                    |                                                            | 4.1 (3.2-5.2)                                              |
| <b>Number of Rx. OUD symptoms</b>                                                                |                                                          |                                                                      |                                  |                                                            |                                                            |
| OUD: 0 symptom <sup>a</sup>                                                                      | 60.2 (55.4-64.9)                                         | 84.3 (82.9-85.6)                                                     | 80.8 (79.1-82.4)                 | 0.7 (0.7-0.8)                                              | 0.7 (0.7-0.8)                                              |
| OUD: 1 symptom <sup>a</sup>                                                                      | 17.7 (13.6-22.7)                                         | 10.9 (9.8-12.0)                                                      | 12.0 (10.9-13.2)                 | 1.6 (1.2-2.2)                                              | 1.5 (1.1-2.0)                                              |
| OUD: 2 symptoms <sup>a</sup>                                                                     | 5.8 (3.9-8.7)                                            | 2.9 (2.4-3.6)                                                        | 3.7 (3.1-4.4)                    | 2.0 (1.2-3.3)                                              | 1.6 (1.0-2.5)                                              |
| OUD: 3 symptoms <sup>a</sup>                                                                     | 3.1 (2.1-4.6)                                            | 1.0 (0.6-1.4)                                                        | 1.5 (1.1-2.0)                    | 3.2 (1.9-5.5)                                              | 2.1 (1.4-3.1)                                              |
| OUD: 4 symptoms <sup>a</sup>                                                                     | 3.0 (1.9-4.9)                                            | 0.5 (0.3-0.9)                                                        | 1.1 (0.8-1.4)                    | 5.7 (2.8-11.7)                                             | 2.8 (1.6-4.9)                                              |
| OUD: 5 symptoms <sup>a</sup>                                                                     | 2.4 (1.5-3.8)                                            | 0.3 (0.2-0.6)                                                        | 0.4 (0.2-0.6)                    | 7.8 (3.3-18.1)                                             | 6.2 (3.4-11.4)                                             |
| OUD: $\geq 6$ symptoms                                                                           | 7.7 (5.5-10.7)                                           | 0.2 (0.1-0.3)                                                        | 0.6 (0.5-1.0)                    | 50.9 (24.5-105.8)                                          | 12.5 (7.3-21.4)                                            |

Rx=prescription. Wtd=weighted; <sup>a</sup>: Analyses were limited to respondents without missing data on Rx OUD symptoms.

Supplementary Table 2. Prevalence of receiving any substance use treatment for prescription opioid use problems by the number of prescription opioid use disorder symptoms and misuse status in US adults with past-year prescription opioid use

| Any substance use treatments for prescription opioid use problems in the past year                                     | Adults reporting prescription opioid misuse<br>n=1,556<br>weighted % (95% CI) | Adults reporting prescription opioid use but without misuse<br>n=9,534<br>weighted % (95% CI) | Prevalence ratio<br>(95% CI) |
|------------------------------------------------------------------------------------------------------------------------|-------------------------------------------------------------------------------|-----------------------------------------------------------------------------------------------|------------------------------|
| Number of Rx OUD Symptoms <i>excluding tolerance &amp; withdrawal symptoms for adults</i> reporting use without misuse |                                                                               |                                                                                               |                              |
| OUD: 0 symptom                                                                                                         | 1.0 (0.4-2.6)                                                                 | 0.3 (0.2-0.4)                                                                                 | 3.9 (1.2-12.0)               |
| OUD: 1 symptom                                                                                                         | 3.7 (1.2-11.0)                                                                | 1.5 (0.6-3.4)                                                                                 | 2.5 (0.6-10.2)               |
| OUD: $\geq 2$ symptoms                                                                                                 | 15.2 (9.9-22.9)                                                               | 4.4 (1.9-9.6)                                                                                 | 3.5 (1.4-8.5)                |
